# Supplementary material for: Assessment of Multi-Image Unmanned Aerial Vehicle Based High-Throughput Field Phenotyping of Canopy Temperature
Source: PubMed Central journal article supplement (PMC7052280; doi:10.3389/fpls.2020.00150), 2020-02-25
Supplement: DataSheet_1.pdf [file DataSheet_1.pdf]

## *Supplementary Material*

### 1 UAV flights

**Table 1: Flight dates of UAV measurements. The BBCH stages (Lancashire et al., 1991) give the approximate growth stage of winter wheat during the UAV flights.**

| Date       | Time  | Average<br>BBCH<br>Stage | Date       | Time  | Average<br>BBCH<br>Stage |
|------------|-------|--------------------------|------------|-------|--------------------------|
| 2018-06-04 | 13:47 | 73                       | 2018-06-20 | 11:05 | 81                       |
| 2018-06-07 | 15:20 | 75                       | 2018-06-20 | 12:27 | 81                       |
| 2018-06-07 | 15:48 | 75                       | 2018-06-20 | 14:00 | 81                       |
| 2018-06-16 | 11:19 | 78                       | 2018-06-20 | 15:05 | 81                       |
| 2018-06-16 | 11:46 | 78                       | 2018-06-20 | 15:49 | 81                       |
| 2018-06-16 | 12:50 | 78                       | 2018-06-23 | 15:09 | 82                       |
| 2018-06-16 | 13:15 | 78                       | 2018-06-26 | 10:35 | 83                       |
| 2018-06-16 | 14:06 | 78                       | 2018-06-26 | 13:49 | 83                       |
| 2018-06-16 | 14:32 | 78                       | 2018-06-30 | 11:01 | 85                       |
| 2018-06-16 | 15:27 | 78                       | 2018-07-04 | 13:35 | 87                       |
| 2018-06-20 | 09:24 | 81                       | 2018-07-09 | 13:15 | 92                       |
| 2018-06-20 | 10:11 | 81                       | 2018-07-12 | 14:30 | 92+                      |

## 2 Orthomosaic accuracies

**Table 2: Accuracy parameters of the UAV orthomosaics generated through the processing pipeline as described in the section 2.4 of the main manuscript.**

| Date       | Time  | Altitude<br>(m) | Resolution<br>(cm/px) | Total Error (cm) | Total<br>Error (px) |
|------------|-------|-----------------|-----------------------|------------------|---------------------|
| 2018-06-04 | 13:47 | 75.10           | 5.07                  | 8.56             | 0.92                |
| 2018-06-07 | 15:20 | 88.90           | 5.05                  | 7.69             | 0.11                |
| 2018-06-07 | 15:48 | 74.60           | 5.04                  | 5.68             | 0.08                |
| 2018-06-16 | 11:19 | 75.70           | 5.10                  | 4.18             | 0.08                |
| 2018-06-16 | 11:46 | 94.00           | 5.11                  | 5.89             | 0.10                |
| 2018-06-16 | 12:50 | 90.00           | 4.90                  | 3.69             | 0.11                |
| 2018-06-16 | 13:15 | 79.70           | 5.19                  | 5.62             | 0.08                |
| 2018-06-16 | 14:06 | 104.00          | 5.68                  | 9.34             | 0.08                |
| 2018-06-16 | 14:32 | 74.80           | 5.04                  | 4.01             | 0.09                |
| 2018-06-16 | 15:27 | 75.40           | 5.08                  | 2.39             | 0.12                |
| 2018-06-20 | 09:24 | 74.20           | 5.01                  | 9.43             | 0.08                |
| 2018-06-20 | 10:11 | 73.20           | 4.93                  | 7.00             | 0.08                |
| 2018-06-20 | 11:05 | 78.80           | 4.93                  | 6.31             | 0.08                |
| 2018-06-20 | 12:28 | 97.70           | 4.91                  | 4.65             | 0.09                |
| 2018-06-20 | 14:00 | 75.10           | 5.07                  | 5.62             | 0.07                |
| 2018-06-20 | 15:05 | 106.00          | 5.94                  | 8.45             | 0.08                |
| 2018-06-20 | 15:49 | 108.00          | 6.00                  | 13.94            | 0.07                |
| 2018-06-23 | 15:09 | 87.30           | 4.89                  | 6.23             | 0.13                |
| 2018-06-26 | 10:35 | 92.90           | 5.00                  | 9.08             | 0.08                |
| 2018-06-26 | 13:49 | 112.00          | 6.08                  | 15.41            | 0.07                |
| 2018-06-30 | 11:01 | 87.30           | 5.08                  | 10.05            | 0.10                |
| 2018-07-04 | 13:35 | 89.30           | 5.11                  | 7.67             | 0.13                |
| 2018-07-09 | 13:15 | 75.70           | 5.10                  | 4.43             | 0.10                |
| 2018-07-12 | 14:30 | 75.60           | 5.05                  | 3.86             | 0.12                |

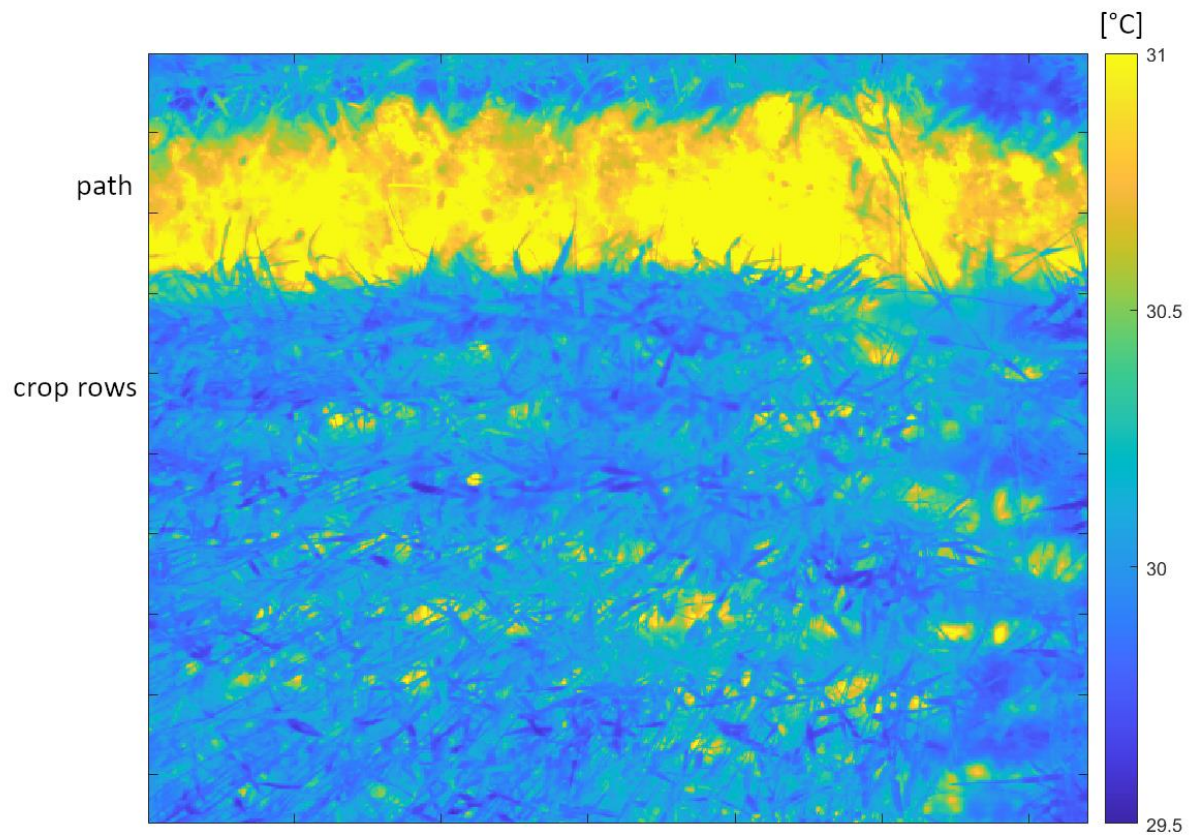

**Appendix figure 1: High-resolution thermal image taken with the FIP phenotyping station (Kirchgessner et al. 2017) at nadir camera position taken at 11:39h on the 2018-06-20. The soil is considerably warmer than the canopy.**

### 3 Linear relationship between blending modes

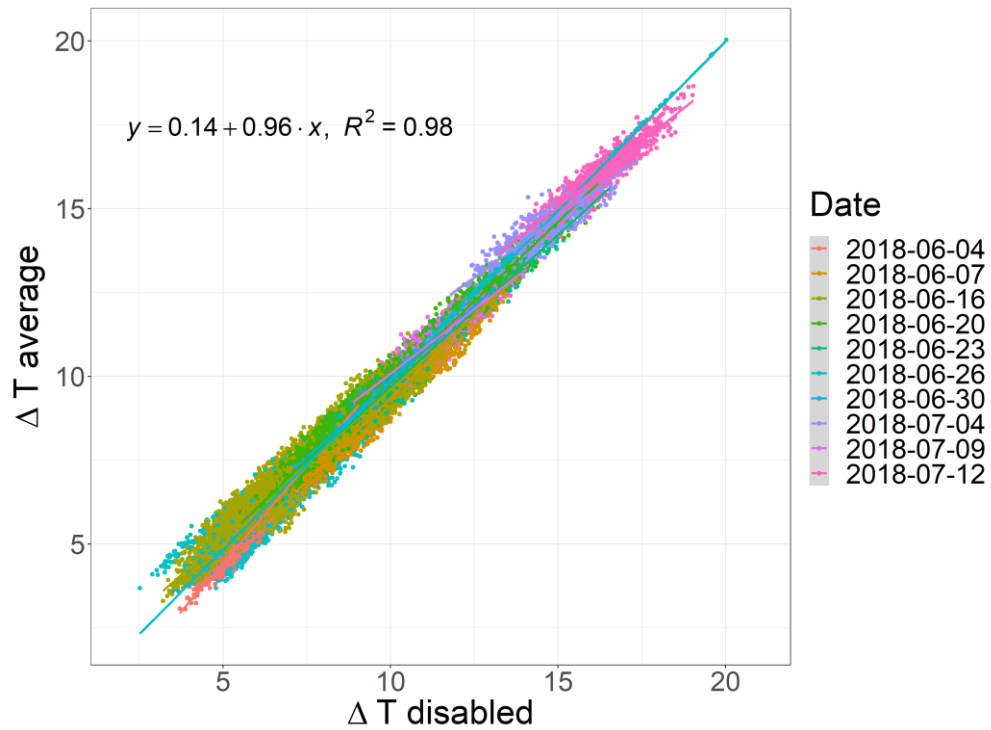

**Appendix figure 2: Overall linear relationship (Intercept = 0.14, slope = 0.96,  $R^2 = 0.98$ ) between the canopy temperature values obtained with the blending modes 'average' and 'disabled' colored by date of UAV flight.**

**Table 3: Parameters of the linear relation between the two evaluated blending modes (‘average’ and ‘disabled’ for each UAV flight (timestamp)).**

| <b>Timestamp</b> | <b>R2</b> | <b>Slope</b> | <b>Intercept</b> |
|------------------|-----------|--------------|------------------|
| 04.06.2018 13:47 | 0.92      | 1.16         | -1.37            |
| 07.06.2018 15:20 | 0.90      | 0.94         | -0.12            |
| 07.06.2018 15:48 | 0.78      | 0.81         | 1.58             |
| 16.06.2018 11:19 | 0.84      | 0.74         | 1.37             |
| 16.06.2018 11:46 | 0.87      | 0.88         | 0.64             |
| 16.06.2018 12:50 | 0.81      | 0.82         | 1.60             |
| 16.06.2018 13:15 | 0.88      | 0.80         | 1.37             |
| 16.06.2018 14:06 | 0.92      | 0.95         | 0.07             |
| 16.06.2018 14:32 | 0.93      | 0.91         | 1.11             |
| 16.06.2018 15:27 | 0.90      | 0.84         | 1.14             |
| 20.06.2018 09:24 | 1.00      | 1.00         | 0.00             |
| 20.06.2018 10:11 | 0.92      | 0.87         | 0.78             |
| 20.06.2018 11:05 | 0.96      | 0.89         | 0.84             |
| 20.06.2018 12:27 | 0.96      | 0.87         | 1.27             |
| 20.06.2018 14:00 | 0.98      | 0.92         | 0.81             |
| 20.06.2018 15:05 | 0.98      | 0.90         | 0.94             |
| 20.06.2018 15:49 | 1.00      | 1.00         | 0.00             |
| 23.06.2018 15:09 | 0.97      | 0.91         | 0.62             |
| 26.06.2018 10:35 | 0.73      | 0.70         | 1.50             |
| 26.06.2018 13:49 | 1.00      | 1.00         | 0.00             |
| 30.06.2018 11:01 | 0.96      | 0.90         | 0.81             |
| 04.07.2018 13:35 | 0.82      | 0.72         | 3.90             |
| 09.07.2018 13:15 | 0.87      | 0.77         | 2.43             |
| 12.07.2018 14:30 | 0.87      | 0.78         | 3.28             |
